# Supplementary material for: Iodine-mediated photoATRP in aqueous media with oxygen tolerance
Source: Royal Society of Chemistry journal article supplement (doi:10.1039/c9py01650c), 2019-12-06
Supplement: c9py01650c1.pdf [file c9py01650c1.pdf]

Supporting Information

# Iodine-Mediated PhotoATRP in Aqueous Media with Oxygen Tolerance

Sajjad Dadashi-Silab,<sup>a</sup> Grzegorz Szczepaniak,<sup>a,b</sup> Sushil Lathwal<sup>a</sup> and Krzysztof Matyjaszewski<sup>a\*</sup>

<sup>a</sup>Department of Chemistry, Carnegie Mellon University, 4400 Fifth Avenue, Pittsburgh, Pennsylvania 15213, United States

<sup>b</sup>Faculty of Chemistry, University of Warsaw, Żwirki i Wigury 101, 02-089 Warsaw, Poland

\*Email: [km3b@andrew.cmu.edu](mailto:km3b@andrew.cmu.edu)

## EXPERIMENTAL

### Materials

Poly(ethylene glycol) methyl ether methacrylate ( $M_n$  300, PEGMA<sub>300</sub>, Sigma-Aldrich) was passed through a column of basic alumina to remove inhibitor. Ethyl  $\alpha$ -bromophenylacetate (EBPA, 97 % Sigma-Aldrich), tetrabutylammonium iodide (TBAI, Fisher Chemical), potassium iodide (KI, Fisher Chemical), sodium iodide (NaI, Sigma-Aldrich), and lithium iodide (LiI, Sigma-Aldrich) were used as received.

### Instrumentation

<sup>1</sup>H nuclear magnetic resonance (<sup>1</sup>H NMR) measurements were performed on a Bruker Avance™ III 500 MHz spectrometer. Molecular weight properties of the polymers were determined by size-exclusion chromatography (SEC). The SEC instrument was equipped with a Waters 515 pump and Waters 410 differential refractometer. SEC measurements were performed using PSS columns (Styrogel 10<sup>5</sup>, 10<sup>3</sup>, 10<sup>2</sup> Å) with DMF as an eluent at the flow rate of 1 mL/min. Linear poly(methyl methacrylate) standards were used for calibration. Polymerizations were irradiated under blue ( $\lambda_{\max}$  = 465 nm, 12 mW/cm<sup>2</sup>), green ( $\lambda_{\max}$  = 520 nm, 4.5 mW/cm<sup>2</sup>), and yellow ( $\lambda_{\max}$  = 595 nm, 0.6 mW/cm<sup>2</sup>) light LEDs purchased from aspectLED.

### General procedure for iodine-mediated photoATRP

Into a 2-dram vial equipped with a stir bar was added TBAI (103.4 mg, 0.28 mmol, 4 equiv.) The vial was sealed with a septum rubber and was subjected to vacuum and back filling with nitrogen for three times. PEGMA<sub>300</sub> monomer (1 mL, 3.5 mmol, 50 equiv.) and water (3 mL, 75 vol %) degassed with nitrogen in separate containers for 30 min were added to the vial under nitrogen atmosphere. EBPA (12.2  $\mu$ L, 70  $\mu$ mol, 1 equiv.) was added into the solution and the vial was irradiated under blue LEDs to start the polymerization. Samples were taken and analyzed by NMR and SEC techniques.

Supporting polymerization results:

### Polymerizations using TBAI:

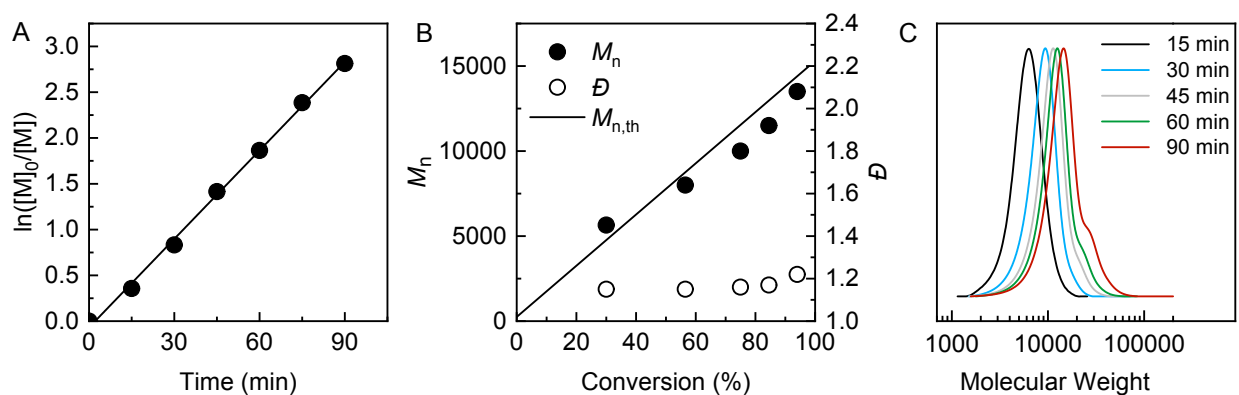

**Figure S1.** Iodine-mediated photoATRP in aqueous media. Reaction conditions:  $[PEGMA_{300}]/[EBPA]/[TBAI] = 50/1/4$  in 50 vol % water. Irradiated under blue LEDs ( $\lambda_{max} = 460$  nm,  $12$  mW/cm<sup>2</sup>). (A) Kinetics of the polymerization. (B) Number-average molecular weight ( $M_n$ , solid points) and dispersity ( $\mathcal{D}$ , open points) as a function of monomer conversion. (C) SEC traces.

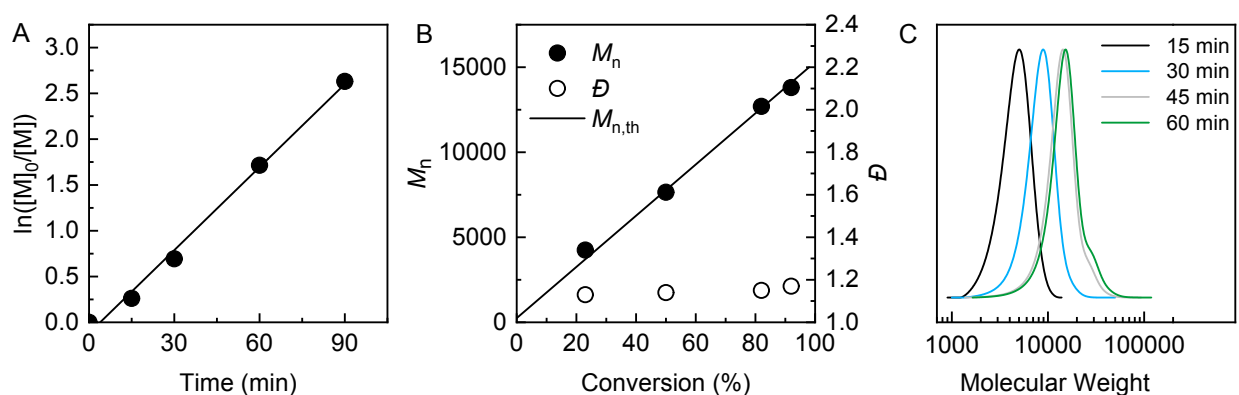

**Figure S2.** Iodine-mediated photoATRP in aqueous media. Reaction conditions:  $[PEGMA_{300}]/[EBPA]/[TBAI] = 50/1/4$  in 67 vol % water. Irradiated under blue LEDs ( $\lambda_{max} = 460$  nm,  $12$  mW/cm<sup>2</sup>). (A) Kinetics of the polymerization. (B) Number-average molecular weight ( $M_n$ , solid points) and dispersity ( $\mathcal{D}$ , open points) as a function of monomer conversion. (C) SEC traces.

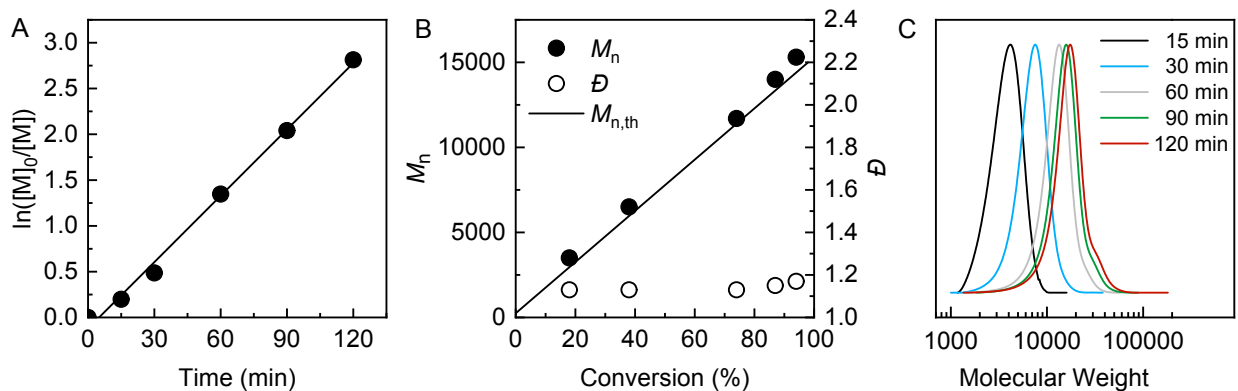

**Figure S3.** Iodine-mediated photoATRP in aqueous media. Reaction conditions: [PEGMA<sub>300</sub>]/[EBPA]/[TBAI] = 50/1/4 in 75 vol % water. Irradiated under blue LEDs ( $\lambda_{\max} = 460$  nm, 12 mW/cm<sup>2</sup>). (A) Kinetics of the polymerization. (B) Number-average molecular weight ( $M_n$ , solid points) and dispersity ( $D$ , open points) as a function of monomer conversion. (C) SEC traces.

#### Polymerizations using KI:

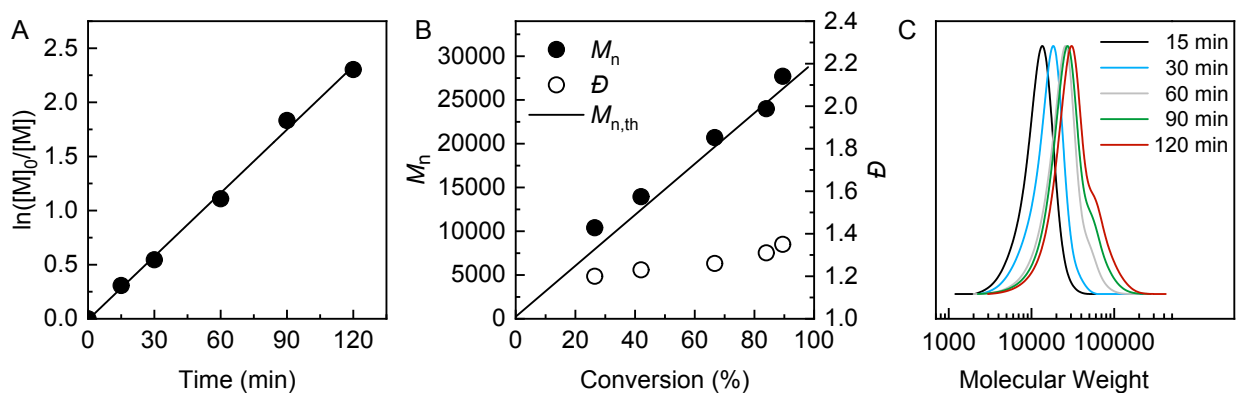

**Figure S4.** Iodine-mediated photoATRP in aqueous media. Reaction conditions: [PEGMA<sub>300</sub>]/[EBPA]/[KI] = 100/1/4 in 50 vol % water. Irradiated under blue LEDs ( $\lambda_{\max} = 460$  nm, 12 mW/cm<sup>2</sup>). (A) Kinetics of the polymerization. (B) Number-average molecular weight ( $M_n$ , solid points) and dispersity ( $D$ , open points) as a function of monomer conversion. (C) SEC traces.

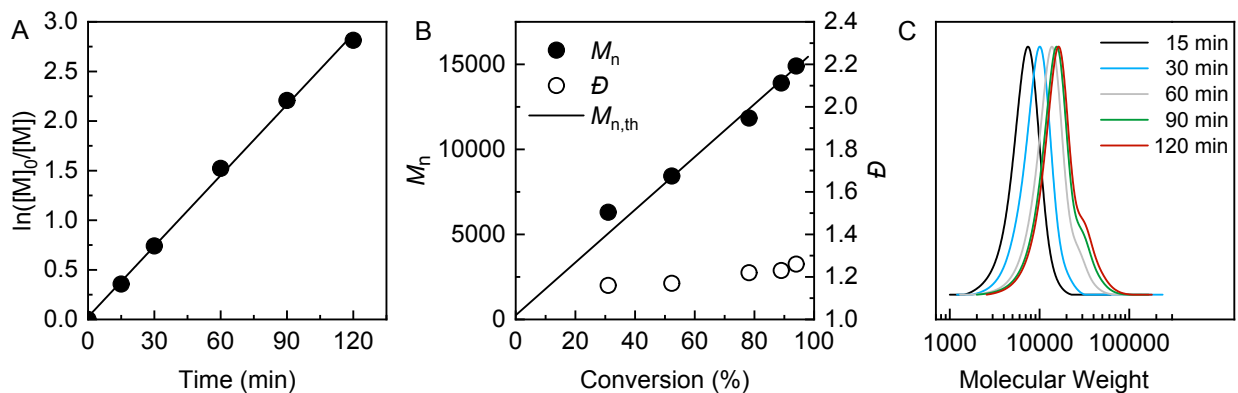

**Figure S5.** Iodine-mediated photoATRP in aqueous media. Reaction conditions:  $[PEGMA_{300}]/[EBPA] / [KI] = 50/1/4$  in 50 vol % water. Irradiated under blue LEDs ( $\lambda_{max} = 460$  nm,  $12$  mW/cm<sup>2</sup>). (A) Kinetics of the polymerization. (B) Number-average molecular weight ( $M_n$ , solid points) and dispersity ( $D$ , open points) as a function of monomer conversion. (C) SEC traces.

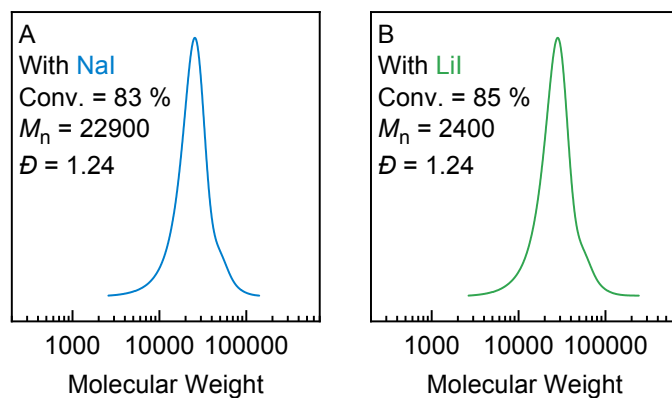

**Figure S6.** Results of iodine-mediated photoATRP of PEGMA<sub>300</sub> monomer in the presence of (A) sodium iodide (NaI) and (B) lithium iodide (LiI) salts. Reaction conditions:  $[PEGMA_{300}]/[EBPA] / [I^-] = 100/1/4$  in 75 vol % water. Irradiated under blue LEDs ( $\lambda_{max} = 460$  nm,  $12$  mW/cm<sup>2</sup>) for 2 h.
